# Supplementary material
Source: publisher figshare collection journal article supplement (https://acs.figshare.com/ndownloader/files/5708940)

# Inorganic Chemistry

including bioinorganic chemistry

Inorg. Chem., 1998, 37(7), 1540-1543, DOI: [10.1021/ic971113v](https://doi.org/10.1021/ic971113v)

## Terms & Conditions

Electronic Supporting Information files are available without a subscription to ACS Web Editions. The American Chemical Society holds a copyright ownership interest in any copyrightable Supporting Information. Files available from the ACS website may be downloaded for personal use only. Users are not otherwise permitted to reproduce, republish, redistribute, or sell any Supporting Information from the ACS website, either in whole or in part, in either machine-readable form or any other form without permission from the American Chemical Society. For permission to reproduce, republish and redistribute this material, requesters must process their own requests via the RightsLink permission system. Information about how to use the RightsLink permission system can be found at

<http://pubs.acs.org/page/copyright/permissions.html>

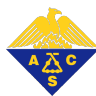

ACS Publications

MOST TRUSTED. MOST CITED. MOST READ.

Copyright © 1998 American Chemical Society

### *General Experimental*

EPR sample preparation was carried out under a nitrogen atmosphere in a Vacuum Atmospheres glovebox. THF and toluene were distilled from sodium benzophenone-ketyl prior to use. Solvents were subjected to several freeze-pump-thaw cycles prior to use. X-band EPR spectra were recorded on an IBM-Brüker E200SRC spectrometer. A quartz finger dewar filled with liquid nitrogen was used for recording spectra at 77 K. Variable-temperature fluid solution EPR experiments were performed using an IBM Model ER4111VT variable-temperature unit. Chemicals were purchased from Aldrich Chemical Co. and used as received, except for the amines which were vacuum distilled from  $\text{CaH}_2$  and subjected to several freeze-pump-thaw cycles prior to use. Lithium from Aldrich may contain 5% Na. See ref. 1 for preparation and details of the bulk electrolysis of **1**.

The preparation of  $\text{Na}_2\text{1}^{2-\bullet\bullet}/\text{PMDTA}$  was carried out in a glovebox under a nitrogen atmosphere. A 1 mM solution (PMDTA: THF 1:9, 10 mL) of **1** was stirred for 90 min. over a freshly prepared sodium mirror. The initial light green solution darkened then became colorless. This solution was then filtered through glass wool into a second flask containing another 10 mL of the bis-orthoquinone solution. This resulted in an immediate color change to a dark green solution. This solution was used immediately for EPR spectroscopy. Precipitation of  $\text{Na}_2\text{1}^{2-\bullet\bullet}$  is observable within a few hours and gives a blue-green solid.

# Sample Simulated EPR Spectra

0.83 mM M(3,5-DBSQ)/177 mM PMDTA/THF  
EPR Spectra and Simulations

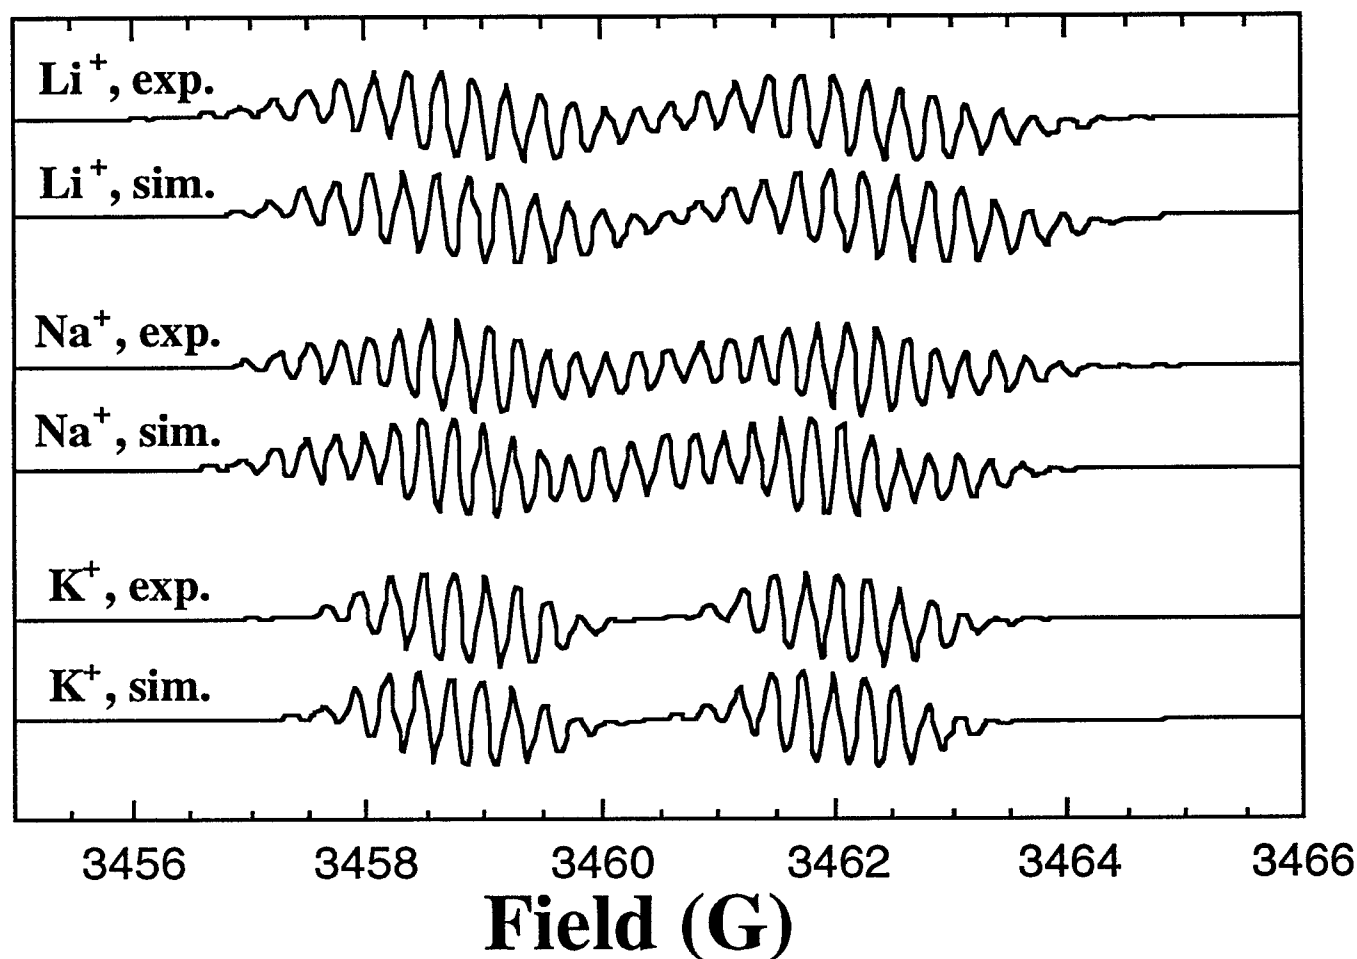

# Tabulated Hyperfine Coupling Constants from Simulated EPR Spectra

| Solvent | Metal | Amine | $a_H$ (G) | $a_H$ (G) | $a_H$ (G) | $a_M$ (G) | LW <sup>a</sup> (G) | Coeff. <sup>b</sup> |
|---------|-------|-------|-----------|-----------|-----------|-----------|---------------------|---------------------|
| THF     | Li    | None  | 3.42      | 0.91      | 0.29      | 0.50      | 0.10                | 0.976               |
|         |       | TEA   | 3.42      | 0.71      | 0.28      | 0.58      | 0.11                | 0.990               |
|         |       | TMEDA | 3.41      | 0.71      | 0.28      | 0.58      | 0.10                | 0.994               |
|         |       | PMDTA | 3.38      | 0.63      | 0.27      | 0.56      | 0.11                | 0.995               |
|         | Na    | None  | 3.33      | 0.70      | 0.27      | 0.49      | 0.09                | 0.997               |
|         |       | TEA   | 3.32      | 0.69      | 0.27      | 0.49      | 0.09                | 0.995               |
|         |       | TMEDA | 3.32      | 0.69      | 0.27      | 0.49      | 0.09                | 0.996               |
|         |       | PMDTA | 3.33      | 0.71      | 0.27      | 0.50      | 0.08                | 0.999               |
|         | K     | None  | 3.28      | 0.80      | 0.27      | ---c      | 0.11                | 0.998               |
|         |       | TEA   | 3.28      | 0.79      | 0.27      | ---c      | 0.11                | 0.998               |
|         |       | TMEDA | 3.28      | 0.79      | 0.27      | ---c      | 0.11                | 0.998               |
|         |       | PMDTA | 3.28      | 0.79      | 0.27      | ---c      | 0.10                | 0.997               |
| Toluene | Li    | None  | ---d      | ---d      | ---d      | ---d      | ---d                | ---d                |
|         |       | TEA   | ---d      | ---d      | ---d      | ---d      | ---d                | ---d                |
|         |       | TMEDA | 3.41      | 0.71      | 0.33      | 0.55      | 0.20                | 0.973               |
|         |       | PMDTA | 3.37      | 0.61      | 0.27      | 0.57      | 0.12                | 0.998               |
|         | Na    | None  | ---d      | ---d      | ---d      | ---d      | ---d                | ---d                |
|         |       | TEA   | ---d      | ---d      | ---d      | ---d      | ---d                | ---d                |
|         |       | TMEDA | 3.33      | 0.64      | 0.27      | 0.59      | 0.10                | 0.983               |
|         |       | PMDTA | 3.32      | 0.62      | 0.78      | 0.57      | 0.09                | 0.997               |
|         | K     | None  | ---d      | ---d      | ---d      | ---d      | ---d                | ---d                |
|         |       | TEA   | ---d      | ---d      | ---d      | ---d      | ---d                | ---d                |
|         |       | TMEDA | ---d      | ---d      | ---d      | ---d      | ---d                | ---d                |
|         |       | PMDTA | 3.26      | 0.70      | 0.27      | ---c      | 0.14                | 0.995               |

<sup>a</sup>Line width. <sup>b</sup>Correlation coefficient. <sup>c</sup>Hfcc not observed. <sup>d</sup>Lines too broad for meaningful simulation.

# EPR Spectrum as a Function of Equivalents of Amine

**Titration Plot**  
**LiDBSQ 2.0 mM in THF**  
**titrated with PMDTA**

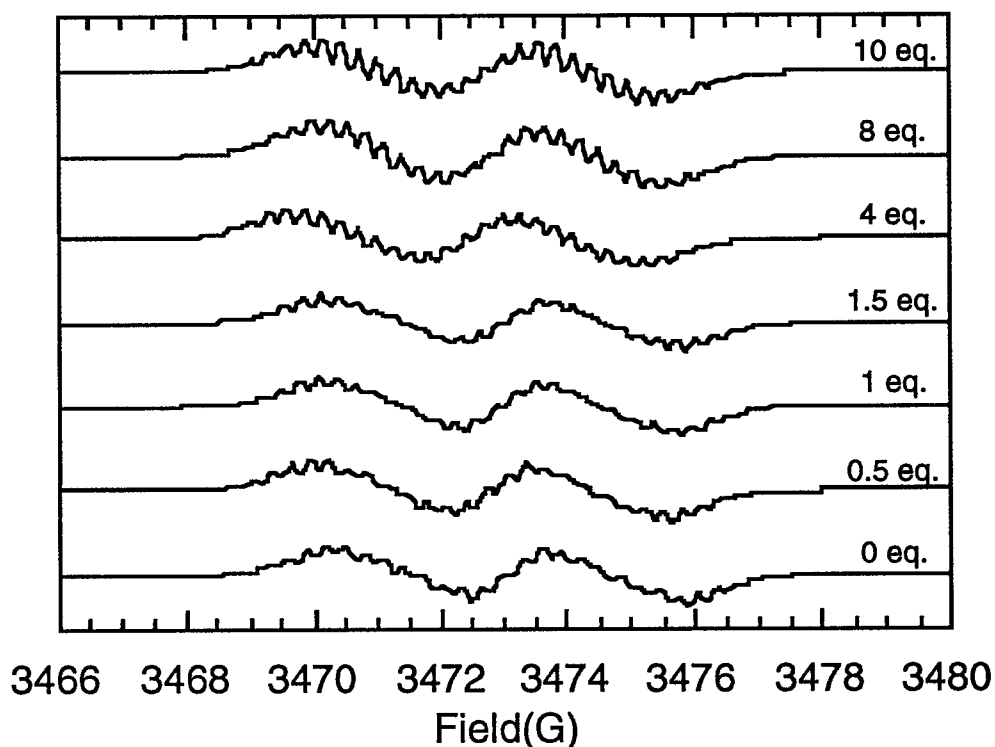

# Variable-temperature EPR Spectra in Toluene

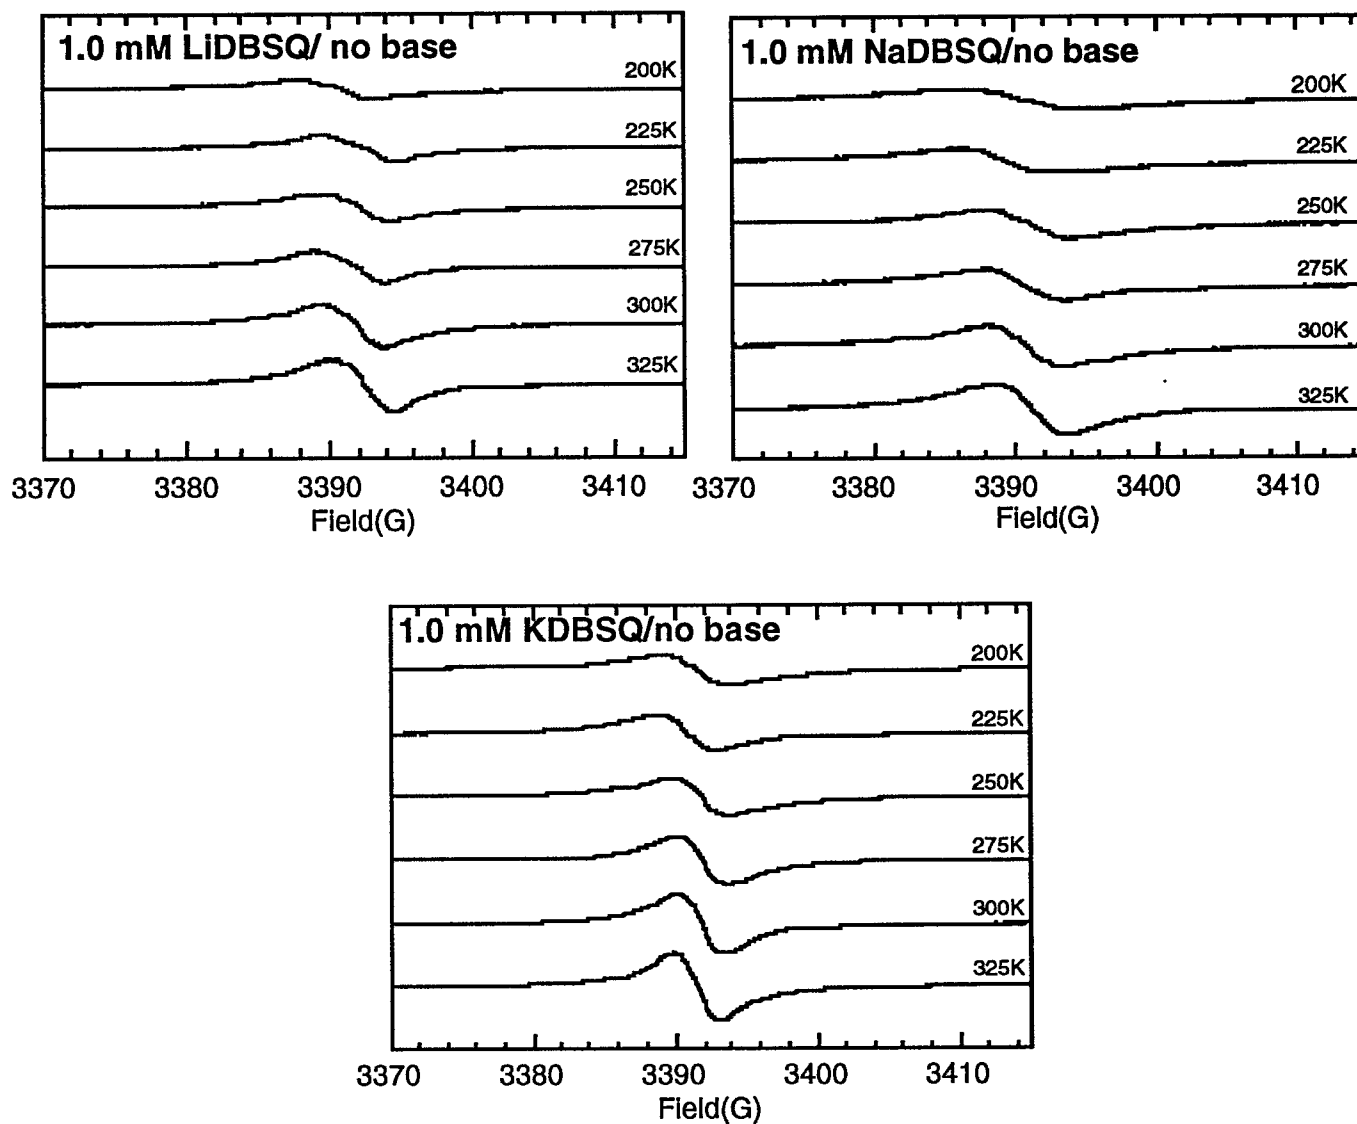

**$\Delta m_s = 2$  Transitions**

**M(3,5-DBSQ) in THF at 77 K**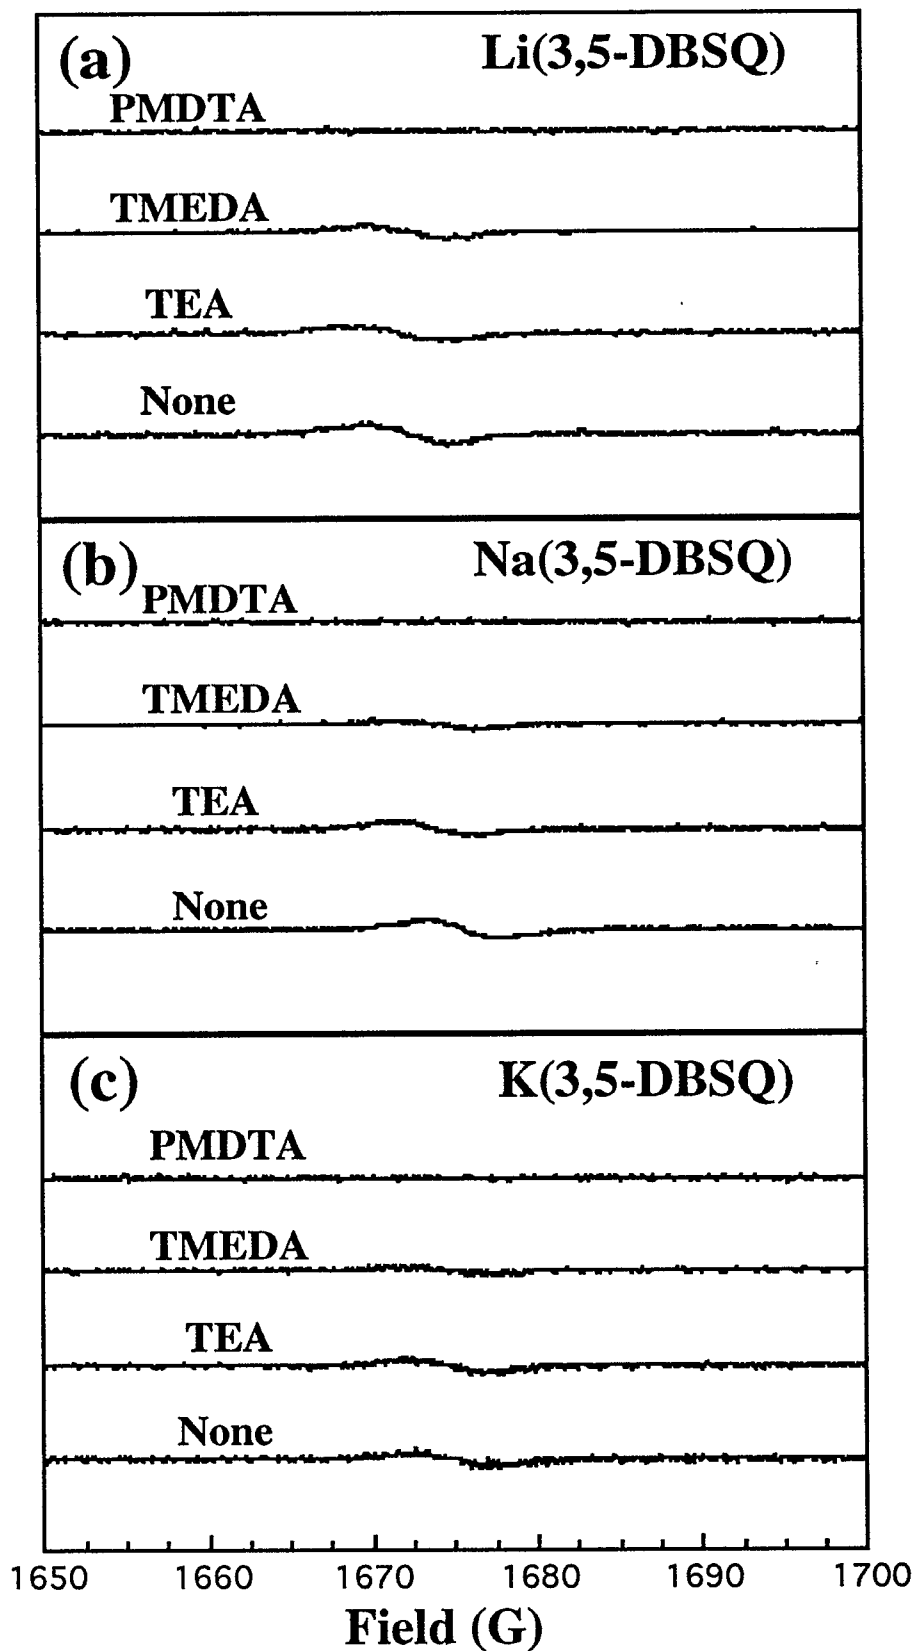



## M(3,5-DBSQ) in Toluene at 77 K

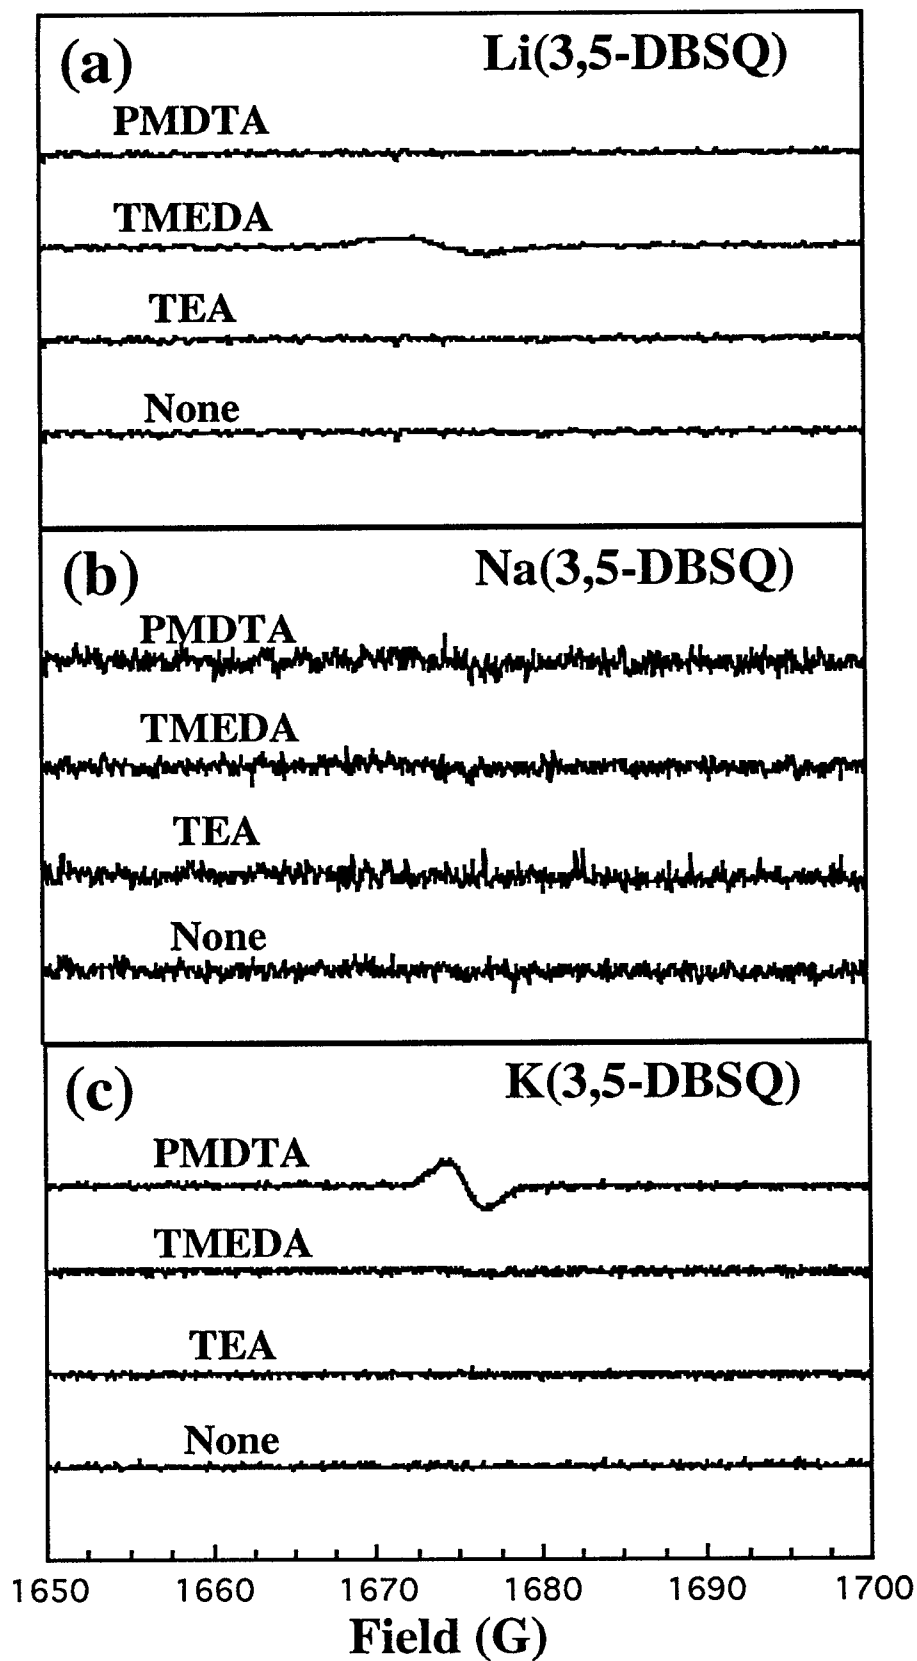

Supplement: Supplementary file 1 [file 5708940]
